# Supplementary material for: Risk Associated with Cumulative Oral Glucocorticoid Use in Patients with Giant Cell Arteritis in Real-World Databases from the USA and UK
Source: PubMed Central journal article supplement — Rheumatol Ther. 2018 May 11;5(2):327–40. doi: 10.1007/s40744-018-0112-8 (PMC6251855; doi:10.1007/s40744-018-0112-8), 2018-05-11
Supplement: 40744_2018_112_MOESM1_ESM.pdf [file 40744_2018_112_MOESM1_ESM.pdf]

Supplemental Data for:

**Risk Associated With Cumulative Oral Glucocorticoid Use in Patients With Giant Cell Arteritis in Real-World Databases From the USA and UK**

Sara Gale, Jessica C. Wilson, Jenny Chia, Huong Trinh, Katie Tuckwell, Neil Collinson, Sophie Dimonaco, Susan Jick, Christoph Meier, Shalini V. Mohan, Khaled Sarsour

Submission to *Rheumatology & Therapy*

This supplement contains:

- 2 tables

**Supplemental Table 1.** Prednisone-equivalent dose conversions. The total dose per prescription was calculated by multiplying the metric quantity in each prescription by its strength.

| <b>Glucocorticoid class</b> | <b>Prednisone equivalent conversion</b>              |
|-----------------------------|------------------------------------------------------|
| Betamethasone               | $(5 \times \text{total dose per prescription})/0.6$  |
| Cortisone                   | $(5 \times \text{total dose per prescription})/25$   |
| Dexamethasone               | $(5 \times \text{total dose per prescription})/0.75$ |
| Hydrocortisone              | $(5 \times \text{total dose per prescription})/20$   |
| Methylprednisolone          | $(5 \times \text{total dose per prescription})/4$    |
| Prednisolone or prednisone  | $(5 \times \text{total dose per prescription})/5$    |
| Triamcinolone               | $(5 \times \text{total dose per prescription})/4$    |
| Fludrocortisone acetate     | $500 \times \text{total dose per prescription}$      |

**Supplemental Table 2.** Baseline exclusion criteria for prior conditions. Patients were excluded if the condition or endpoint occurred within the indicated amount of time prior to index date.

| <b>Condition or endpoint</b>                | <b>Baseline exclusion criteria:<br/>timing of event, prior to index date</b> |
|---------------------------------------------|------------------------------------------------------------------------------|
| Myocardial infarction (including silent MI) | ≤ 30 days                                                                    |
| Cerebrovascular accident                    | ≤ 30 days                                                                    |
| Acute coronary syndrome                     | ≤ 30 days                                                                    |
| Hospitalization for unstable angina         | ≤ 30 days                                                                    |
| Hospitalization for heart failure           | ≤ 30 days                                                                    |
| Hepatotoxic events                          | ≤ 365 days                                                                   |
| GI perforation                              | ≤ 30 days                                                                    |
| Malignancies                                | ≤ 365 days                                                                   |
| Serious infections                          | ≤ 30 days                                                                    |
| Opportunistic infections                    | ≤ 30 days                                                                    |
| Pneumonia                                   | ≤ 30 days                                                                    |
| Serious GI bleeding events                  | ≤ 30 days                                                                    |
| Demyelination                               | ≤ 365 days                                                                   |
| Blood pressure                              | ≤ 365 days                                                                   |
| Endocrine-related conditions                | ≤ 365 days                                                                   |
| Bone health-related conditions              | ≤ 30 days                                                                    |
| Muscle- and tendon-related conditions       | ≤ 365 days                                                                   |
| Eye-related conditions                      | ≤ 365 days                                                                   |
| Glucose tolerance-related conditions        | ≤ 365 days                                                                   |
| Skin-related conditions                     | ≤ 365 days                                                                   |
| Neuropsychiatric conditions                 | ≤ 365 days                                                                   |
| GI tract-related conditions                 | ≤ 365 days                                                                   |

GI, gastrointestinal; MI, myocardial infarction.
